# Supplementary material for: A First Assessment of Mycobacterium tuberculosis Genetic Diversity and Drug-Resistance Patterns in Twelve Caribbean Territories
Source: Biomed Res Int. 2014 Mar 10;2014:718496. doi: 10.1155/2014/718496 (PMC3985416; doi:10.1155/2014/718496)
Supplement: Supplementary file 1 — Supplemental Table S1: Spoligotype patterns and phylogenetical lineages observed among 480 M. tuberculosis clinical isolates isolated in 12 countries of the Caribbean. A total of 425/480 or 88.5% isolates were grouped in 49 clusters (2 to 93 isolates per cluster), while 55/480 or 11.5% were unclustered. Furthermore, 395/480 or 82.3% isolates were correctly classified among one of the lineages present in the database. [file 718496.f1.pdf]

**Supplemental Table S1:** Spoligotype patterns and phylogenetical lineages observed among 480 *M. tuberculosis* clinical isolates isolated in 12 countries of the Caribbean.

[illegible]

[illegible]

\* Note that the number n=100 for the “other/unknown” group corresponds to the sum of patterns with no clade attribution (see Table 1), as well as profiles other than the 7 majors lineages described in the text (note that 16 orphan patterns shown in Table 1 are equally split in this supplemental table as 8 being classified among various lineages while the other 8 belong to the “other/unknown” group).
